# Supplementary material for: The Relationship between Phytochemical Composition and Biological Activities of Differently Pigmented Varieties of Berry Fruits; Comparison between Embedded in Food Matrix and Isolated Anthocyanins
Source: PubMed Central journal article supplement (PMC6963230; doi:10.3390/foods8120646), 2019-12-05
Supplement: foods-08-00646-s001.pdf [file foods-08-00646-s001.pdf]

Table 1S. Identification of phenolics in raspberry, grape, mulberry and currant extracts by DAD-ESI-MS

| Peak no. | t <sub>R</sub> [min] | λ <sub>max</sub> (nm) | MS (+)     | MS (-)     | Mw  | Tentative identification       | Presence in extracts |      |      |      |      |      |      |      |      |
|----------|----------------------|-----------------------|------------|------------|-----|--------------------------------|----------------------|------|------|------|------|------|------|------|------|
|          |                      |                       |            |            |     |                                | YRas                 | RRas | WGra | RGra | WMul | BMul | WCur | RCur | BCur |
| 1        | 3.2                  | 240                   | 215 (M+Na) | 191 (M-H)  | 192 | Quinic acid                    | +                    | +    | -    | -    | -    | -    | -    | -    | -    |
| 2        | 4.6                  | 270                   | 171 (M+H)  | 169 (M-H)  | 170 | Gallic acid                    | -                    | -    | -    | +    | -    | -    | -    | -    | -    |
| 3        | 5.1                  | 250                   | 229 (M+Na) | 205 (M-H)  | 206 | nd                             | +                    | +    | -    | -    | -    | +    | -    | -    | -    |
| 4        | 6.0                  | 260                   | 323 (M+Na) | 299 (M-H)  | 300 | Hydroxybenzoic acid hexoside   | -                    | -    | -    | -    | -    | +    | -    | -    | -    |
| 5        | 6.8                  | 250, 300              | 132        | 198, 331   | nd  | nd                             | -                    | -    | -    | +    | -    | -    | -    | -    | -    |
| 6        | 7.1                  | 280                   | 127        | 198, 523   | nd  | nd                             | -                    | -    | -    | +    | -    | -    | -    | -    | -    |
| 7        | 7.2                  | 260, 290sh            | 392 (M+Na) | 368 (M-H)  | 369 | nd                             | +                    | +    | -    | -    | -    | +    | -    | -    | -    |
| 8        | 7.3                  | 260                   | 323 (M+Na) | 299 (M-H)  | 300 | Hydroxybenzoic acid hexoside   | -                    | -    | +    | -    | -    | -    | +    | +    | +    |
| 9        | 7.4                  | 260                   | 367 (M+Na) | 343 (M-H)  | 344 | nd                             | +                    | +    | -    | -    | -    | -    | -    | -    | -    |
| 10       | 7.9                  | 260, 290sh            | 635 (M+Na) | 647 (M+Cl) | 612 | nd                             | -                    | -    | -    | -    | -    | +    | -    | -    | -    |
| 11       | 8.5                  | 260, 280sh, 325       | -          | 353 (M-H)  | 354 | Chlorogenic acid               | -                    | -    | -    | -    | -    | -    | -    | -    | +    |
| 12       | 8.7                  | 280                   | 291 (M+H)  | 279 (M-H)  | 290 | (+)-Catechin                   | -                    | +    | -    | +    | +    | +    | -    | -    | -    |
| 13       | 8.9                  | 265, 295              | 353 (M+Na) | 329 (M-H)  | 330 | Vannilic acid hexoside         | -                    | -    | +    | -    | -    | -    | +    | +    | -    |
| 14       | 9                    | 260, 330              | 618 (M+H)  | 616 (M-H)  | 617 | nd                             | -                    | -    | -    | +    | -    | -    | -    | -    | -    |
| 15       | 9.2                  | 260, 290, 325         | 365 (M+Na) | 341 (M-H)  | 342 | Caffeic acid hexoside          | +                    | +    | -    | -    | -    | +    | +    | +    | -    |
| 16       | 10.0                 | 280                   | 579 (M+H)  | 577 (M-H)  | 578 | Procyanidin dimer              | -                    | -    | -    | +    | -    | +    | -    | -    | -    |
| 17       | 10.2                 | 300                   | 349 (M+Na) | 361 (M+Cl) | 326 | Coumaric acid hexoside         | -                    | -    | +    | -    | -    | -    | +    | +    | +    |
| 18       | 10.9                 | 260,280sh             | -          | 935 (M-H)  | 936 | Galloyl bis-HHDP-hexoside      | +                    | +    | -    | -    | -    | +    | -    | -    | -    |
| 19       | 11.0                 | 280                   | 579 (M+H)  | 577 (M-H)  | 578 | Procyanidin dimer              | -                    | -    | -    | +    | -    | -    | -    | -    | -    |
| 20       | 11.6                 | 260, 300sh            | 467 (M+Na) | 443 (M-H)  | 444 | nd                             | -                    | -    | -    | +    | -    | -    | -    | -    | -    |
| 21       | 11.7                 | 300                   | 349 (M+Na) | 361 (M+Cl) | 326 | Coumaric acid hexoside         | -                    | -    | +    | -    | -    | -    | +    | +    | +    |
| 22       | 12.1                 | 280                   | 317        | 729        | nd  | nd                             | -                    | -    | -    | +    | -    | -    | -    | -    | -    |
| 23       | 12.2                 | 300                   | 349 (M+Na) | 361 (M+Cl) | 326 | Coumaric acid hexoside         | -                    | -    | +    | -    | -    | -    | +    | +    | +    |
| 24       | 12.4                 | 300                   | 349 (M+Na) | 361 (M+Cl) | 326 | Coumaric acid hexoside         | -                    | -    | +    | -    | -    | -    | -    | -    | -    |
| 25       | 12.5                 | 275                   | 188, 205   | -          | nd  | nd                             | -                    | -    | -    | +    | -    | -    | +    | +    | +    |
| 26       | 12.9                 | 260, 325              | 651 (M+Na) | 627 (M-H)  | 628 | nd                             | -                    | +    | -    | -    | -    | +    | -    | -    | -    |
| 27       | 13.5                 | 280                   | 291        | 289        | 290 | (-)-Epicatechin                | -                    | -    | -    | +    | -    | +    | -    | -    | -    |
| 28       | 13.9                 | 275                   | 338 (M+H)  | 372 (M+Cl) | 337 | nd                             | -                    | -    | +    | -    | -    | +    | +    | +    | -    |
| 29       | 13.9                 | 525                   | 611 (M+H)  | 609 (M-H)  | 610 | Cyanidin sophoroside           | -                    | +    | -    | -    | -    | +    | -    | -    | -    |
| 30       | 14.2                 | 525                   | 465 (M+H)  | 463 (M-H)  | 464 | Delphinidin glucoside          | -                    | -    | -    | +    | -    | -    | -    | -    | +    |
| 31       | 14.4                 | 525                   | 757 (M+H)  | 755 (M-H)  | 756 | Cyanidin rutinoside glucoside  | -                    | +    | -    | -    | -    | +    | -    | -    | -    |
| 32       | 14.9                 | 525                   | 611 (M+H)  | 609 (M-H)  | 610 | Delphinidin rutinoside         | -                    | -    | -    | -    | -    | -    | -    | -    | +    |
| 33       | 15.0                 | 525                   | 581 (M+H)  | 579 (M-H)  | 580 | Cyanidin sambubioside          | -                    | -    | -    | -    | -    | -    | -    | +    | -    |
| 34       | 15.2                 | 525                   | 727 (M+H)  | 725 (M-H)  | 726 | Cyanidin xyloside rutinoside   | -                    | -    | -    | -    | -    | -    | -    | +    | -    |
| 35       | 15.3                 | 525                   | 449 (M+H)  | 447 (M-H)  | 448 | Cyanidin glucoside             | -                    | +    | -    | +    | -    | +    | -    | -    | +    |
| 36       | 15.9                 | 525                   | 595 (M+H)  | 593 (M-H)  | 594 | Cyanidin rutinoside            | -                    | +    | -    | -    | -    | +    | -    | +    | +    |
| 37       | 16.1                 | 525                   | 479 (M+H)  | 477 (M-H)  | 478 | Petunidin glucoside            | -                    | -    | -    | +    | -    | -    | -    | -    | -    |
| 38       | 16.4                 | 260, 360              | 619 (M+Na) | 595 (M-H)  | 596 | Quercetin arabinoside          | -                    | +    | -    | -    | -    | -    | -    | -    | -    |
| 39       | 16.7                 | 525                   | 271, 433   | 431, 467   | 432 | Pelargonidin hexoside          | -                    | -    | -    | -    | -    | +    | -    | -    | -    |
| 40       | 16.9                 | 260, 360              | 649 (M+Na) | 625 (M-H)  | 626 | Quercetin hexoside hexoside    | -                    | -    | -    | -    | -    | +    | -    | -    | -    |
| 41       | 17.0                 | 260                   | 418 (M+Na) | 394 (M-H)  | 395 | nd                             | -                    | -    | -    | -    | -    | -    | +    | +    | +    |
| 42       | 17.2                 | 250, 300sh, 360       | 435 (M+H)  | 433 (M-H)  | 434 | Ellagic acid pentose conjugate | -                    | +    | -    | -    | -    | -    | -    | -    | -    |
| 43       | 17.4                 | 525                   | 463 (M+H)  | 499 (M+Cl) | 462 | Peonidin glucoside             | -                    | -    | -    | +    | -    | -    | -    | -    | -    |
| 44       | 17.6                 | 260, 350              | 487 (M+Na) | 499 (M+Cl) | 464 | Quercetin hexoside             | -                    | -    | +    | -    | -    | -    | -    | -    | -    |

|    |      |                 |            |            |     |                                       |   |   |   |   |   |   |   |   |   |
|----|------|-----------------|------------|------------|-----|---------------------------------------|---|---|---|---|---|---|---|---|---|
| 45 | 17.8 | 525             | 493 (M+H)  | 527 (M+Cl) | 492 | Malvidin glucoside                    | - | - | - | + | - | - | - | - | - |
| 46 | 17.9 | 525             | 697 (M+H)  | 695 (M-H)  | 696 | Cyanidin malonyl-diglucoside          | - | - | - | - | - | + | - | - | - |
| 47 | 18.1 | 260, 360        | 487 (M+Na) | 499 (M+Cl) | 464 | Quercetin hexoside                    | - | - | + | - | - | - | - | - | - |
| 48 | 18.2 | 260, 360        | 463 (M+H)  | 479 (M+Cl) | 462 | Isoramenthin hexoside                 | - | - | - | + | - | - | - | - | - |
| 49 | 18.4 | 260, 360        | 503 (M+Na) | 479 (M-H)  | 480 | Myricetin glucoside                   | - | - | - | - | - | - | - | - | + |
| 50 | 18.8 | 260, 360        | 633 (M+Na) | 609 (M-H)  | 610 | Quercetin galactoside rhamnoside      | - | + | - | - | - | + | - | - | - |
| 51 | 19.3 | 260, 300sh,360  | 597 (M+H)  | 595 (M-H)  | 596 | Quercetin glucoside xyloside          | - | - | - | - | - | + | - | - | - |
| 52 | 19.8 | 525             | 303, 507   | 505        | 506 | Delphinidin acetyl-glucoside          | - | - | - | + | - | - | - | - | - |
| 53 | 19.9 | 525             | 507, 773   | 771        | 772 | Delphinidin coumaryl-diglucoside      | - | - | - | + | - | - | - | - | - |
| 54 | 20.0 | 250, 300sh, 360 | 435 (M+H)  | 433 (M-H)  | 434 | Ellagic acid pentose conjugate        | - | + | - | - | - | + | - | - | - |
| 55 | 20.4 | 260, 360        | 479 (M+H)  | 477 (M-H)  | 478 | Quercetin glucuronide                 | - | - | - | + | - | - | - | - | - |
| 56 | 20.6 | 260, 360        | 633 (M+Na) | 609 (M-H)  | 610 | Rutin                                 | - | - | + | - | - | - | + | + | + |
| 57 | 20.7 | 260, 360        | 487 (M+Na) | 463 (M-H)  | 464 | Quercetin hexoside                    | - | - | - | + | - | + | - | - | + |
| 58 | 21.1 | 525             | 787 (M+H)  | 821 (M+Cl) | 786 | Petunidin coumaryl-diglucoside        | - | - | - | + | - | - | - | - | - |
| 59 | 21.2 | 260, 360        | 529 (M+Na) | 541 (M+Cl) | 506 | nd                                    | - | - | - | - | - | - | + | + | + |
| 60 | 21.4 | 260, 360        | 303 (M+H)  | 301 (M-H)  | 302 | Quercetin                             | - | - | - | - | - | + | - | - | - |
| 61 | 21.5 | 525             | 521 (M+H)  | 519 (M-H)  | 520 | Petunidin acetyl-glucoside            | - | - | - | + | - | - | - | - | - |
| 62 | 21.7 | 250, 300sh, 360 | 435 (M+H)  | 433 (M-H)  | 434 | Ellagic acid pentose conjugate        | - | - | - | - | - | + | - | - | - |
| 63 | 21.9 | 525             | 801 (M+H)  | 835 (M-H)  | 800 | Malvidin coumaryl-diglucoside         | - | - | - | + | - | - | - | - | - |
| 64 | 22.5 | 260, 360        | 471 (M+Na) | 447 (M-H)  | 448 | Quercetin rhamnoside                  | - | - | - | - | - | - | - | + | - |
| 65 | 22.6 | 250, 300sh, 360 | 449 (M+H)  | 447 (M-H)  | 448 | Methyl ellagic acid pentose conjugate | - | + | - | - | - | - | - | - | - |
| 66 | 22.7 | 525             | 535 (M+H)  | 569 (M+Cl) | 534 | Malvidin acetyl-glucoside             | - | - | - | + | - | - | - | - | - |
| 67 | 22.9 | 260, 310, 360sh | 617 (M+Na) | 593 (M-H)  | 594 | Kaempferol coumaryl-glucoside         | - | - | - | - | - | - | - | + | + |
| 68 | 23.1 | 525             | 611 (M+H)  | 609 (M+Cl) | 610 | Delphinidin coumaryl-glucoside        | - | - | - | + | - | - | - | - | - |
| 69 | 23.3 | 260, 310        | -          | 475 (M-H)  | 476 | Ellagic acid acetyl-hexoside          | - | + | - | - | - | - | - | - | - |
| 70 | 23.4 | 525             | 611 (M+H)  | 609 (M-H)  | 610 | Peonidin rutinoside                   | - | - | - | - | - | - | - | - | + |
| 71 | 23.9 | 310             | -          | 475 (M-H)  | 476 | Ellagic acid acetyl-arabinside        | - | + | - | - | - | - | - | - | - |
| 72 | 24.1 | 525             | 595 (M+H)  | 593 (M-H)  | 594 | Cyanidin coumaryl-glucoside           | - | - | - | - | - | - | - | - | + |
| 73 | 24.1 | 525             | 625 (M+H)  | 623 (M-H)  | 624 | Petunidin coumaryl-glucoside          | - | - | - | + | - | - | - | - | - |
| 74 | 24.6 | 525             | 639 (M+H)  | 673 (M+Cl) | 638 | Malvidin coumaryl-glucoside           | - | - | - | + | - | - | - | - | - |

Hydroxybenzoic acid derivatives

Hydroxycinnamic acid derivatives

Flavan-3-ols

Anthocyanins

Flavonols
